# Supplementary material for: Who infects whom?—Reconstructing infection chains of Mycobacterium avium ssp. paratuberculosis in an endemically infected dairy herd by use of genomic data
Source: PubMed Central journal article supplement (PMC8118464; doi:10.1371/journal.pone.0246983), 2021-05-13
Supplement: pone.0246983.s002.pdf [file pone.0246983.s002.pdf]

**”Who infects Whom“ - Reconstructing infection chains of *Mycobacterium avium* ssp. *paratuberculosis* in an endemically infected dairy herd by use of genomic data (Nigsch et al., 2021)**

Supporting information S2 Fig.

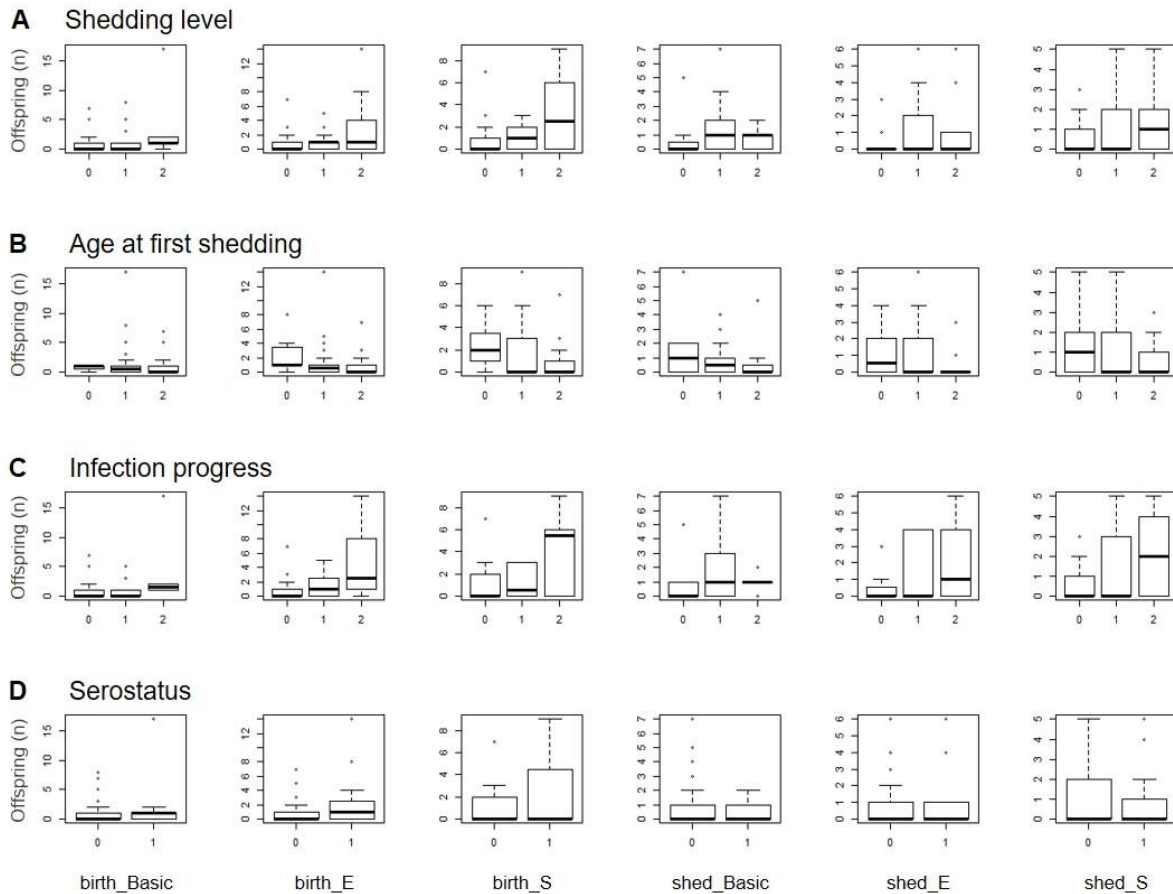

**S2 Fig. Numbers of recipients produced by individual cows.** Boxplots with numbers of recipients produced by individual cows, by disease phenotype and scenario. **(A)** shedding level (0 – always faecal culture negative, 1 - low, 2 – high), **(B)** age at first shedding (0 -  $\leq 3$  years, 1 -  $> 3$  years, 2 - ante mortem negative), **(C)** infection progress (0 - ante mortem negative, 1 - non-progressor, 2 - progressor), **(D)** serostatus (0 - ELISA-negative, 1 - ELISA-positive). Scenarios (from left-most to right-most column): [birth\_Basic], [birth\_E], [birth\_S], [shed\_Basic], [shed\_E] and [shed\_S].
